# Supplementary material
Source: PubMed Central journal article supplement (PMC8061023)
Supplement: 13073_2021_866_MOESM4_ESM.pdf [file 13073_2021_866_MOESM4_ESM.pdf]

**Supplementary Note.** NHLBI Trans-Omics for Precision Medicine (TOPMed) Consortium  
Banner Authorship List.

Namiko Abe<sup>1</sup>, Gonçalo Abecasis<sup>2</sup>, Francois Aguet<sup>3</sup>, Christine Albert<sup>4,5</sup>, Laura Almasy<sup>6</sup>, Alvaro Alonso<sup>7</sup>, Seth Ament<sup>8</sup>, Peter Anderson<sup>9</sup>, Pramod Anugu<sup>10</sup>, Deborah Applebaum-Bowden<sup>11</sup>, Kristin Ardlie<sup>3</sup>, Dan Arking<sup>12</sup>, Donna K Arnett<sup>13</sup>, Allison Ashley-Koch<sup>14</sup>, Stella Aslibekyan<sup>15</sup>, Tim Assimes<sup>16</sup>, Paul Auer<sup>17</sup>, Dimitrios Avramopoulos<sup>12</sup>, John Barnard<sup>18</sup>, Kathleen Barnes<sup>19</sup>, R. Graham Barr<sup>20</sup>, Emily Barron-Casella<sup>12</sup>, Lucas Barwick<sup>21</sup>, Terri Beaty<sup>12</sup>, Gerald Beck<sup>22</sup>, Diane Becker<sup>23</sup>, Lewis Becker<sup>12</sup>, Rebecca Beer<sup>24</sup>, Amber Beitelshees<sup>8</sup>, Emelia Benjamin<sup>25,26</sup>, Takis Benos<sup>27</sup>, Marcos Bezerra<sup>28</sup>, Larry Bielak<sup>2</sup>, Joshua Bis<sup>29</sup>, Thomas Blackwell<sup>2</sup>, John Blangero<sup>30</sup>, Eric Boerwinkle<sup>31</sup>, Donald W. Bowden<sup>32</sup>, Russell Bowler<sup>33</sup>, Jennifer Brody<sup>9</sup>, Ulrich Broeckel<sup>34</sup>, Jai Broome<sup>9</sup>, Karen Bunting<sup>1</sup>, Esteban Burchard<sup>35</sup>, Carlos Bustamante<sup>36</sup>, Erin Buth<sup>37</sup>, Brian Cade<sup>38</sup>, Jonathan Cardwell<sup>39</sup>, Vincent Carey<sup>4</sup>, Cara Carty<sup>40</sup>, Richard Casaburi<sup>41</sup>, James Casella<sup>12</sup>, Peter Castaldi<sup>42</sup>, Mark Chaffin<sup>3</sup>, Christy Chang<sup>8</sup>, Yi-Cheng Chang<sup>43</sup>, Daniel Chasman<sup>44</sup>, Sameer Chavan<sup>39</sup>, Bo-Juen Chen<sup>1</sup>, Wei-Min Chen<sup>45</sup>, Yii-Der Ida Chen<sup>46</sup>, Michael Cho<sup>4</sup>, Seung Hoan Choi<sup>3</sup>, Lee-Ming Chuang<sup>47</sup>, Mina Chung<sup>48</sup>, Ren-Hua Chung<sup>49</sup>, Clary Clish<sup>3</sup>, Suzy Comhair<sup>50</sup>, Matthew Conomos<sup>37</sup>, Elaine Cornell<sup>51</sup>, Adolfo Correa<sup>52</sup>, Carolyn Crandall<sup>41</sup>, James Crapo<sup>53</sup>, L. Adrienne Cupples<sup>54</sup>, Joanne Curran<sup>55</sup>, Jeffrey Curtis<sup>2</sup>, Brian Custer<sup>56</sup>, Coleen Damcott<sup>8</sup>, Dawood Darbar<sup>57</sup>, Sayantan Das<sup>2</sup>, Sean David<sup>58</sup>, Colleen Davis<sup>9</sup>, Michelle Daya<sup>39</sup>, Mariza de Andrade<sup>59</sup>, Lisa de las Fuentes<sup>60</sup>, Michael DeBaun<sup>61</sup>, Ranjan Deka<sup>62</sup>, Dawn DeMeo<sup>4</sup>, Scott Devine<sup>8</sup>, Qing Duan<sup>63</sup>, Ravi Duggirala<sup>64</sup>, Jon Peter Durda<sup>51</sup>, Susan Dutcher<sup>65</sup>, Charles Eaton<sup>66</sup>, Lynette Ekunwe<sup>10</sup>, Adel El Boueiz<sup>67</sup>, Patrick Ellinor<sup>26</sup>, Leslie Emery<sup>9</sup>, Serpil Erzurum<sup>18</sup>, Charles Farber<sup>45</sup>, Tasha Fingerlin<sup>68</sup>, Matthew Flickinger<sup>2</sup>, Myriam Fornage<sup>31</sup>, Nora Franceschini<sup>69</sup>, Chris Frazar<sup>9</sup>, Mao Fu<sup>8</sup>, Stephanie M. Fullerton<sup>9</sup>, Lucinda Fulton<sup>65</sup>, Stacey Gabriel<sup>3</sup>, Weiniu Gan<sup>24</sup>, Shanshan Gao<sup>39</sup>, Yan Gao<sup>10</sup>, Margery Gass<sup>70</sup>, Bruce Gelb<sup>71</sup>, Xiaoqi (Priscilla) Geng<sup>2</sup>, Mark Geraci<sup>72</sup>, Soren Germer<sup>1</sup>, Robert Gerszten<sup>73</sup>, Auyon Ghosh<sup>4</sup>, Richard Gibbs<sup>74</sup>, Chris Gignoux<sup>16</sup>, Mark Gladwin<sup>27</sup>, David Glahn<sup>75</sup>, Stephanie Gogarten<sup>9</sup>, Da-Wei Gong<sup>8</sup>, Harald Goring<sup>76</sup>, Sharon Graw<sup>19</sup>, Daniel Grine<sup>39</sup>, C. Charles Gu<sup>65</sup>, Yue Guan<sup>8</sup>, Xiuqing Guo<sup>46</sup>, Namrata Gupta<sup>3</sup>, Jeff Haessler<sup>70</sup>, Michael Hall<sup>10</sup>, Daniel Harris<sup>8</sup>, Nicola L. Hawley<sup>77</sup>, Jiang He<sup>78</sup>, Ben Heavner<sup>37</sup>, Susan Heckbert<sup>9</sup>, Ryan Hernandez<sup>35,79</sup>, David Herrington<sup>80</sup>, Craig Hersh<sup>81</sup>, Bertha Hidalgo<sup>15</sup>, James Hixson<sup>31</sup>, Brian Hobbs<sup>4</sup>, John Hokanson<sup>39</sup>, Elliott Hong<sup>8</sup>, Karin Hoth<sup>82</sup>, Chao (Agnes) Hsiung<sup>83</sup>, Yi-Jen Hung<sup>84</sup>, Haley Huston<sup>85</sup>, Chii Min Hwu<sup>86</sup>, Marguerite Ryan Irvin<sup>15</sup>, Rebecca Jackson<sup>87</sup>, Deepti Jain<sup>9</sup>, Cashell Jaquish<sup>24</sup>, Min A Jhun<sup>2</sup>, Jill Johnsen<sup>88</sup>, Andrew Johnson<sup>24</sup>, Craig Johnson<sup>9</sup>, Rich Johnston<sup>7</sup>, Kimberly Jones<sup>12</sup>, Hyun Min Kang<sup>89</sup>, Robert Kaplan<sup>90</sup>, Sharon Kardia<sup>2</sup>, Sekar Kathiresan<sup>3</sup>, Shannon Kelly<sup>56</sup>, Eimear Kenny<sup>71</sup>, Michael Kessler<sup>8</sup>, Alyna Khan<sup>9</sup>, Wonji Kim<sup>91</sup>, Greg Kinney<sup>39</sup>, Barbara Konkle<sup>85</sup>, Charles Kooperberg<sup>70</sup>, Holly Kramer<sup>92</sup>, Christoph Lange<sup>93</sup>, Ethan Lange<sup>39</sup>, Leslie Lange<sup>39</sup>, Cathy Laurie<sup>9</sup>, Cecelia Laurie<sup>9</sup>, Meryl LeBoff<sup>4</sup>, Jiwon Lee<sup>4</sup>, Seunggeun Shawn Lee<sup>2</sup>, Wen-Jane Lee<sup>86</sup>, Jonathon LeFaive<sup>2</sup>, David Levine<sup>9</sup>, Dan Levy<sup>24</sup>, Joshua Lewis<sup>8</sup>, Xiaohui Li<sup>46</sup>, Yun Li<sup>63</sup>, Henry Lin<sup>46</sup>, Honghuang Lin<sup>94</sup>, Keng Han Lin<sup>2</sup>, Xihong Lin<sup>95</sup>, Simin Liu<sup>96</sup>, Yongmei Liu<sup>97</sup>, Yu Liu<sup>98</sup>, Ruth J.F. Loos<sup>99</sup>, Steven Lubitz<sup>26</sup>, Kathryn Lunetta<sup>94</sup>, James Luo<sup>24</sup>, Michael Mahaney<sup>55</sup>, Barry Make<sup>12</sup>, Ani Manichaikul<sup>45</sup>, JoAnn Manson<sup>4</sup>, Lauren Margolin<sup>3</sup>, Lisa Martin<sup>100</sup>, Susan Mathai<sup>39</sup>, Rasika Mathias<sup>12</sup>, Susanne May<sup>37</sup>, Patrick McArdle<sup>8</sup>, Merry-Lynn McDonald<sup>15</sup>, Sean McFarland<sup>91</sup>, Stephen McGarvey<sup>66</sup>, Daniel McGoldrick<sup>9</sup>, Caitlin McHugh<sup>37</sup>, Hao Mei<sup>10</sup>, Luisa Mestroni<sup>19</sup>, Deborah A Meyers<sup>101</sup>, Julie Mikulla<sup>24</sup>, Nancy Min<sup>10</sup>,

Mollie Minear<sup>24</sup>, Ryan L Minster<sup>27</sup>, Braxton D. Mitchell<sup>8</sup>, Matt Moll<sup>42</sup>, May E. Montasser<sup>8</sup>, Courtney Montgomery<sup>102</sup>, Arden Moscati<sup>71</sup>, Solomon Musani<sup>52</sup>, Stanford Mwasongwe<sup>10</sup>, Josyf C Mychaleckyj<sup>45</sup>, Girish Nadkarni<sup>71</sup>, Rakhi Naik<sup>12</sup>, Take Naseri<sup>103</sup>, Pradeep Natarajan<sup>3,26,91</sup>, Sergei Nekhai<sup>104</sup>, Sarah C. Nelson<sup>37</sup>, Bonnie Neltner<sup>39</sup>, Deborah Nickerson<sup>9</sup>, Kari North<sup>63</sup>, Jeff O'Connell<sup>8</sup>, Tim O'Connor<sup>8</sup>, Heather Ochs-Balcom<sup>105</sup>, David Paik<sup>106</sup>, Nicholette Palmer<sup>107</sup>, James Pankow<sup>108</sup>, George Papanicolaou<sup>24</sup>, Afshin Parsa<sup>8</sup>, Juan Manuel Peralta<sup>64</sup>, Marco Perez<sup>16</sup>, James Perry<sup>8</sup>, Ulrike Peters<sup>109</sup>, Patricia Peyser<sup>2</sup>, Lawrence S Phillips<sup>7</sup>, Toni Pollin<sup>8</sup>, Wendy Post<sup>110</sup>, Julia Powers Becker<sup>111</sup>, Meher Preethi Boorgula<sup>39</sup>, Michael Preuss<sup>71</sup>, Bruce Psaty<sup>9</sup>, Pankaj Qasba<sup>24</sup>, Dandi Qiao<sup>4</sup>, Zhaohui Qin<sup>7</sup>, Nicholas Rafaels<sup>39</sup>, Laura Raffield<sup>112</sup>, Vasam S. Ramachandran<sup>94</sup>, D.C. Rao<sup>65</sup>, Laura Rasmussen-Torvik<sup>113</sup>, Aakrosh Ratan<sup>45</sup>, Susan Redline<sup>4</sup>, Robert Reed<sup>8</sup>, Elizabeth Regan<sup>53</sup>, Alex Reiner<sup>109</sup>, Muagututi'a Sefuiva Reupena<sup>114</sup>, Ken Rice<sup>9</sup>, Stephen Rich<sup>45</sup>, Dan Roden<sup>115</sup>, Carolina Roselli<sup>3</sup>, Jerome Rotter<sup>46</sup>, Ingo Ruczinski<sup>12</sup>, Pamela Russell<sup>39</sup>, Sarah Ruuska<sup>85</sup>, Kathleen Ryan<sup>8</sup>, Ester Cerdeira Sabino<sup>116</sup>, Danish Saleheen<sup>20</sup>, Shabnam Salimi<sup>8</sup>, Steven Salzberg<sup>12</sup>, Kevin Sandow<sup>117</sup>, Vijay G. Sankaran<sup>3,118</sup>, Christopher Scheller<sup>2</sup>, Ellen Schmidt<sup>2</sup>, Karen Schwander<sup>65</sup>, David Schwartz<sup>39</sup>, Frank Sciruba<sup>27</sup>, Christine Seidman<sup>119</sup>, Jonathan Seidman<sup>120</sup>, Vivien Sheehan<sup>121</sup>, Stephanie L. Sherman<sup>122</sup>, Amol Shetty<sup>8</sup>, Aniket Shetty<sup>39</sup>, Wayne Hui-Heng Sheu<sup>86</sup>, M. Benjamin Shoemaker<sup>123</sup>, Brian Silver<sup>124</sup>, Edwin Silverman<sup>4</sup>, Jennifer Smith<sup>2</sup>, Josh Smith<sup>9</sup>, Nicholas Smith<sup>125</sup>, Tanja Smith<sup>1</sup>, Sylvia Smoller<sup>90</sup>, Beverly Snively<sup>126</sup>, Michael Snyder<sup>16</sup>, Tamar Sofer<sup>4</sup>, Nona Sotoodehnia<sup>9</sup>, Adrienne M. Stilp<sup>9</sup>, Garrett Storm<sup>39</sup>, Elizabeth Streeten<sup>8</sup>, Jessica Lasky Su<sup>4</sup>, Yun Ju Sung<sup>65</sup>, Jody Sylvia<sup>4</sup>, Adam Szpiro<sup>9</sup>, Carole Sztalryd<sup>8</sup>, Daniel Taliun<sup>2</sup>, Hua Tang<sup>127</sup>, Margaret Taub<sup>12</sup>, Kent D. Taylor<sup>128</sup>, Matthew Taylor<sup>19</sup>, Simeon Taylor<sup>8</sup>, Marilyn Telen<sup>14</sup>, Timothy A. Thornton<sup>9</sup>, Machiko Threlkeld<sup>129</sup>, Lesley Tinker<sup>70</sup>, David Tirschwell<sup>9</sup>, Sarah Tishkoff<sup>130</sup>, Hemant Tiwari<sup>131</sup>, Catherine Tong<sup>132</sup>, Russell Tracy<sup>133</sup>, Michael Tsai<sup>108</sup>, Dhananjay Vaidya<sup>12</sup>, David Van Den Berg<sup>134</sup>, Peter VandeHaar<sup>2</sup>, Scott Vrieze<sup>108,135</sup>, Tarik Walker<sup>39</sup>, Robert Wallace<sup>82</sup>, Avram Walts<sup>39</sup>, Fei Fei Wang<sup>9</sup>, Heming Wang<sup>4</sup>, Karol Watson<sup>41</sup>, Daniel E. Weeks<sup>27</sup>, Bruce Weir<sup>9</sup>, Scott Weiss<sup>4</sup>, Lu-Chen Weng<sup>26</sup>, Jennifer Wessel<sup>136</sup>, Cristen Willer<sup>137</sup>, Kayleen Williams<sup>37</sup>, L. Keoki Williams<sup>138</sup>, Carla Wilson<sup>4</sup>, James Wilson<sup>139</sup>, Quenna Wong<sup>9</sup>, Joseph Wu<sup>106</sup>, Huichun Xu<sup>8</sup>, Lisa Yanek<sup>12</sup>, Ivana Yang<sup>39</sup>, Rongze Yang<sup>8</sup>, Norann Zaghoul<sup>8</sup>, Maryam Zekavat<sup>3</sup>, Yingze Zhang<sup>140</sup>, Snow Xueyan Zhao<sup>53</sup>, Wei Zhao<sup>141</sup>, Degui Zhi<sup>31</sup>, Xiang Zhou<sup>2</sup>, Xiaofeng Zhu<sup>142</sup>, Michael Zody<sup>1</sup>, Sebastian Zoellner<sup>2</sup>

1 - New York Genome Center, New York, New York, US; 2 - University of Michigan, Ann Arbor, Michigan, US; 3 - Broad Institute, Cambridge, Massachusetts, US; 4 - Brigham & Women's Hospital, Boston, Massachusetts, US; 5 - Cedars Sinai, Los Angeles, California, US; 6 - Children's Hospital of Philadelphia, University of Pennsylvania, Philadelphia, Pennsylvania, US; 7 - Emory University, Atlanta, Georgia, US; 8 - University of Maryland, Baltimore, Maryland, US; 9 - University of Washington, Seattle, Washington, US; 10 - University of Mississippi, Jackson, Mississippi, US; 11 - National Institutes of Health, Bethesda, Maryland, US; 12 - Johns Hopkins University, Baltimore, Maryland, US; 13 - University of Kentucky, Lexington, Kentucky, US; 14 - Duke University, Durham, North Carolina, US; 15 - University of Alabama, Birmingham, Alabama, US; 16 - Stanford University, Stanford, California, US; 17 - University of Wisconsin Milwaukee, Milwaukee, Wisconsin, US; 18 - Cleveland Clinic, Cleveland, Ohio, US; 19 - University of Colorado Anschutz Medical Campus, Aurora, Colorado, US; 20 - Columbia

University, New York, New York, US; 21 - The Emmes Corporation, LTRC, Rockville, Maryland, US; 22 - Cleveland Clinic, Quantitative Health Sciences, Cleveland, Ohio, US; 23 - Johns Hopkins University, Medicine, Baltimore, Maryland, US; 24 - National Heart, Lung, and Blood Institute, National Institutes of Health, Bethesda, Maryland, US; 25 - Boston University, Massachusetts General Hospital, Boston University School of Medicine, Boston, Massachusetts, US; 26 - Massachusetts General Hospital, Boston, Massachusetts, US; 27 - University of Pittsburgh, Pittsburgh, Pennsylvania, US; 28 - Fundação de Hematologia e Hemoterapia de Pernambuco - Hemope, Recife, BR; 29 - University of Washington, Cardiovascular Health Research Unit, Department of Medicine, Seattle, Washington, US; 30 - University of Texas Rio Grande Valley School of Medicine, Human Genetics, Brownsville, Texas, US; 31 - University of Texas Health at Houston, Houston, Texas, US; 32 - Wake Forest Baptist Health, Department of Biochemistry, Winston-Salem, North Carolina, US; 33 - National Jewish Health, National Jewish Health, Denver, Colorado, US; 34 - Medical College of Wisconsin, Milwaukee, Wisconsin, US; 35 - University of California, San Francisco, San Francisco, California, US; 36 - Stanford University, Biomedical Data Science, Stanford, California, US; 37 - University of Washington, Biostatistics, Seattle, Washington, US; 38 - Brigham & Women's Hospital, Brigham and Women's Hospital, Boston, Massachusetts, US; 39 - University of Colorado at Denver, Denver, Colorado, US; 40 - Washington State University, Pullman, Washington, US; 41 - University of California, Los Angeles, Los Angeles, California, US; 42 - Brigham & Women's Hospital, Medicine, Boston, Massachusetts, US; 43 - National Taiwan University, Taipei, TW; 44 - Brigham & Women's Hospital, Division of Preventive Medicine, Boston, Massachusetts, US; 45 - University of Virginia, Charlottesville, Virginia, US; 46 - Lundquist Institute, Torrance, California, US; 47 - National Taiwan University, National Taiwan University Hospital, Taipei, TW; 48 - Cleveland Clinic, Cleveland Clinic, Cleveland, Ohio, US; 49 - National Health Research Institute Taiwan, Miaoli County, TW; 50 - Cleveland Clinic, Immunity and Immunology, Cleveland, Ohio, US; 51 - University of Vermont, Burlington, Vermont, US; 52 - University of Mississippi, Medicine, Jackson, Mississippi, US; 53 - National Jewish Health, Denver, Colorado, US; 54 - Boston University, Biostatistics, Boston, Massachusetts, US; 55 - University of Texas Rio Grande Valley School of Medicine, Brownsville, Texas, US; 56 - Vitalant Research Institute, San Francisco, California, US; 57 - University of Illinois at Chicago, Chicago, Illinois, US; 58 - University of Chicago, Chicago, Illinois, US; 59 - Mayo Clinic, Health Sciences Research, Rochester, Minnesota, US; 60 - Washington University in St Louis, Department of Medicine, Cardiovascular Division, St. Louis, Missouri, US; 61 - Vanderbilt University, Nashville, Tennessee, US; 62 - University of Cincinnati, Cincinnati, Ohio, US; 63 - University of North Carolina, Chapel Hill, North Carolina, US; 64 - University of Texas Rio Grande Valley School of Medicine, Edinburg, Texas, US; 65 - Washington University in St Louis, St Louis, Missouri, US; 66 - Brown University, Providence, Rhode Island, US; 67 - Harvard University, Channing Division of Network Medicine, Cambridge, Massachusetts, US; 68 - National Jewish Health, Center for Genes, Environment and Health, Denver, Colorado, US; 69 - University of North Carolina, Epidemiology, Chapel Hill, North Carolina, US; 70 - Fred Hutchinson Cancer Research Center, Seattle, Washington, US; 71 - Icahn School of Medicine at Mount Sinai, New York, New York, US; 72 - Indiana University, Medicine, Indianapolis, Indiana, US; 73 - Beth Israel Deaconess Medical Center, Boston, Massachusetts, US; 74 - Baylor College of Medicine Human Genome Sequencing Center,

Houston, Texas, US; 75 - Yale University, New Haven, Connecticut, US; 76 - University of Texas Rio Grande Valley School of Medicine, San Antonio, Texas, US; 77 - Yale University, Department of Chronic Disease Epidemiology, New Haven, Connecticut, US; 78 - Tulane University, New Orleans, Louisiana, US; 79 - McGill University, Montreal, CA; 80 - Wake Forest Baptist Health, Winston-Salem, North Carolina, US; 81 - Brigham & Women's Hospital, Channing Division of Network Medicine, Boston, Massachusetts, US; 82 - University of Iowa, Iowa City, Iowa, US; 83 - National Health Research Institute Taiwan, Institute of Population Health Sciences, NHRI, Miaoli County, TW; 84 - Tri-Service General Hospital National Defense Medical Center, TW; 85 - Blood Works Northwest, Seattle, Washington, US; 86 - Taichung Veterans General Hospital Taiwan, Taichung City, TW; 87 - Ohio State University Wexner Medical Center, Internal Medicine, Division of Endocrinology, Diabetes and Metabolism, Columbus, Ohio, US; 88 - Blood Works Northwest, University of Washington, Seattle, Washington, US; 89 - University of Michigan, Biostatistics, Ann Arbor, Michigan, US; 90 - Albert Einstein College of Medicine, New York, New York, US; 91 - Harvard University, Cambridge, Massachusetts, US; 92 - Loyola University, Public Health Sciences, Maywood, Illinois, US; 93 - Harvard School of Public Health, Biostats, Boston, Massachusetts, US; 94 - Boston University, Boston, Massachusetts, US; 95 - Harvard School of Public Health, Boston, Massachusetts, US; 96 - Brown University, Epidemiology and Medicine, Providence, Rhode Island, US; 97 - Duke University, Cardiology, Durham, North Carolina, US; 98 - Stanford University, Cardiovascular Institute, Stanford, California, US; 99 - Icahn School of Medicine at Mount Sinai, The Charles Bronfman Institute for Personalized Medicine, New York, New York, US; 100 - George Washington University, Washington, District of Columbia, US; 101 - University of Arizona, Tucson, Arizona, US; 102 - Oklahoma Medical Research Foundation, Genes and Human Disease, Oklahoma City, Oklahoma, US; 103 - Ministry of Health, Government of Samoa, Apia, WS; 104 - Howard University, Washington, District of Columbia, US; 105 - University at Buffalo, Buffalo, New York, US; 106 - Stanford University, Stanford Cardiovascular Institute, Stanford, California, US; 107 - Wake Forest Baptist Health, Biochemistry, Winston-Salem, North Carolina, US; 108 - University of Minnesota, Minneapolis, Minnesota, US; 109 - Fred Hutchinson Cancer Research Center, University of Washington, Seattle, Washington, US; 110 - Johns Hopkins University, Cardiology/Medicine, Baltimore, Maryland, US; 111 - University of Colorado at Denver, Medicine, Denver, Colorado, US; 112 - University of North Carolina, Genetics, Chapel Hill, North Carolina, US; 113 - Northwestern University, Chicago, Illinois, US; 114 - Lutia I Puava Ae Mapu I Fagalele, Apia, WS; 115 - Vanderbilt University, Medicine, Pharmacology, Biomedical Informatics, Nashville, Tennessee, US; 116 - Universidade de Sao Paulo, Faculdade de Medicina, Sao Paulo, BR; 117 - Lundquist Institute, TGPS, Torrance, California, US; 118 - Harvard University, Division of Hematology/Oncology, Cambridge, Massachusetts, US; 119 - Harvard Medical School, Genetics, Boston, Massachusetts, US; 120 - Harvard Medical School, Boston, Massachusetts, US; 121 - Baylor College of Medicine, Pediatrics, Houston, Texas, US; 122 - Emory University, Human Genetics, Atlanta, Georgia, US; 123 - Vanderbilt University, Medicine/Cardiology, Nashville, Tennessee, US; 124 - UMass Memorial Medical Center, Worcester, Massachusetts, US; 125 - University of Washington, Epidemiology, Seattle, Washington, US; 126 - Wake Forest Baptist Health, Biostatistical Sciences, Winston-Salem, North Carolina, US; 127 - Stanford University, Genetics, Stanford, California, US; 128 - Lundquist Institute, Institute for Translational Genomics and Populations Sciences, Torrance,

California, US; 129 - University of Washington, University of Washington, Department of Genome Sciences, Seattle, Washington, US; 130 - University of Pennsylvania, Genetics, Philadelphia, Pennsylvania, US; 131 - University of Alabama, Biostatistics, Birmingham, Alabama, US; 132 - University of Washington, Department of Biostatistics, Seattle, Washington, US; 133 - University of Vermont, Pathology & Laboratory Medicine, Burlington, Vermont, US; 134 - University of Southern California, USC Methylation Characterization Center, University of Southern California, California, US; 135 - University of Colorado at Boulder, Boulder, Colorado, US; 136 - Indiana University, Epidemiology, Indianapolis, Indiana, US; 137 - University of Michigan, Internal Medicine, Ann Arbor, Michigan, US; 138 - Henry Ford Health System, Detroit, Michigan, US; 139 - Beth Israel Deaconess Medical Center, Cardiology, Boston, Massachusetts, US; 140 - University of Pittsburgh, Medicine, Pittsburgh, Pennsylvania, US; 141 - University of Michigan, Department of Epidemiology, Ann Arbor, Michigan, US; 142 - Case Western Reserve University, Department of Population and Quantitative Health Sciences, Cleveland, Ohio, US
